# Supplementary material
Source: ML conference proceedings conference paper supplement (https://openreview.net/forum?id=sBrS3M5lT2w)
Supplement: supplementary_material [file attachment]

## A Details for Counter Examples

### A.1 Simple Linear Regression

We begin our exploration of assumptions with a rather simple problem. Let  $Z \in \mathbb{R}$  be a random variable such that  $\mathbb{E}[Z^2] = 1$  and  $\mathbb{E}[Z^4] = 2$ . Moreover, let  $\epsilon$  be an independent random variable with mean zero and variance 1. Finally, let  $\theta^* \in \mathbb{R}$  and define  $Y = Z\theta^* + \epsilon$ . Consider the estimation problem of minimizing  $F(\theta)$  where

$$F(\theta) = \frac{1}{2} \mathbb{E}[(Z\theta - Y)^2] = \frac{1}{2}(\theta - \theta^*)^2 + \frac{1}{2}. \quad (14)$$

Letting  $X = (Y, Z)$ , let  $f(\theta, X) = 0.5(Z\theta - Y)^2$ . Now, the variance of  $\dot{f}(\theta, X)$  is

$$\begin{aligned} & \mathbb{E}[(Z^2 - 1)(\theta - \theta^*) - Z\epsilon]^2 \\ &= \mathbb{E}[(Z^2 - 1)^2](\theta - \theta^*)^2 - 2(\theta - \theta^*)\mathbb{E}[(Z^2 - 1)Z\epsilon] + \mathbb{E}[Z^2\epsilon^2] \\ &= (\theta - \theta^*)^2 + 1. \end{aligned} \quad (15)$$

Clearly, the variance scales with the error in the parameter, which violates the common bounded noise model assumption. In particular, as  $|\theta| \rightarrow \infty$ , the variance diverges.

On the other hand, the simple linear regression problem does satisfy our assumptions. In particular,

1. **Assumptions 1** and **3** are easily verified.
2. Given that  $\dot{F}$  is globally Lipschitz continuous, it is locally Lipschitz continuous. Therefore, **Assumption 2** is satisfied.
3. From the variance calculation of  $\dot{f}(\theta, X)$ , we conclude

$$\mathbb{E}[\dot{f}(\theta, X)^2] = 2(\theta - \theta^*)^2 + 1, \quad (17)$$

which is a continuous function. Hence, **Assumption 4** is satisfied.

### A.2 Feed Forward Network for Binary Classification

We now prove **Proposition 1**. Consider the binary classification problem with label  $Y$  and feature  $Z$  where  $(Y, Z) = (0, 0)$  with probability  $1/2$  and  $(Y, Z) = (1, 1)$  with probability  $1/2$ . We solve this classification problem using the network shown in **Fig. 1** with  $\sigma$  linear and  $\varphi$  sigmoid. We will train this model using the binary cross entropy loss function. Letting  $X = (Y, Z)$  and  $\theta = (W_1, W_2, W_3, W_4)$ ,

$$f(\theta, X) = -Y \log(\hat{y}) - (1 - Y) \log(1 - \hat{y}) + \frac{1}{2} \sum_{i=1}^4 W_i^2, \quad (18)$$

and

$$\hat{y} = \begin{cases} \frac{1}{2} & Z = 0 \\ \frac{1}{1 + \exp(-W_4 W_3 W_2 W_1)} & Z = 1. \end{cases} \quad (19)$$

From this, we compute,

$$F(\theta) = \frac{1}{2} \log(2) + \frac{1}{2} \log[1 + \exp(-W_4 W_3 W_2 W_1)] + \frac{1}{2} \sum_{i=1}^4 W_i^2. \quad (20)$$

Moreover,

$$\dot{f}(\theta, X) = \begin{cases} \begin{bmatrix} W_1 \\ W_2 \\ W_3 \\ W_4 \end{bmatrix} & (Y, Z) = (0, 0) \\ \frac{-1}{1 + \exp(W_4 W_3 W_2 W_1)} \begin{bmatrix} W_4 W_3 W_2 \\ W_4 W_3 W_1 \\ W_4 W_2 W_1 \\ W_3 W_2 W_1 \end{bmatrix} + \begin{bmatrix} W_1 \\ W_2 \\ W_3 \\ W_4 \end{bmatrix} & (Y, Z) = (1, 1), \end{cases} \quad (21)$$

and, consequently,

$$\dot{F}(\theta) = \frac{-1/2}{1 + \exp(W_4 W_3 W_2 W_1)} \begin{bmatrix} W_4 W_3 W_2 \\ W_4 W_3 W_1 \\ W_4 W_2 W_1 \\ W_3 W_2 W_1 \end{bmatrix} + \begin{bmatrix} W_1 \\ W_2 \\ W_3 \\ W_4 \end{bmatrix}. \quad (22)$$

Finally, letting  $\ddot{F}(\theta) = \nabla^2 F(\psi)|_{\psi=\theta}$ ,

$$\begin{aligned} \ddot{F}(\theta) &= \frac{-0.5}{1 + \exp(W_4 W_3 W_2 W_1)} \begin{bmatrix} 0 & W_4 W_3 & W_4 W_2 & W_3 W_2 \\ W_4 W_3 & 0 & W_4 W_1 & W_3 W_1 \\ W_4 W_2 & W_4 W_1 & 0 & W_2 W_1 \\ W_3 W_2 & W_3 W_1 & W_2 W_1 & 0 \end{bmatrix} \\ &+ \frac{0.5 \exp(W_4 W_3 W_2 W_1)}{[1 + \exp(W_4 W_3 W_2 W_1)]^2} \begin{bmatrix} W_4 W_3 W_2 \\ W_4 W_3 W_1 \\ W_4 W_2 W_1 \\ W_3 W_2 W_1 \end{bmatrix} \begin{bmatrix} W_4 W_3 W_2 \\ W_4 W_3 W_1 \\ W_4 W_2 W_1 \\ W_3 W_2 W_1 \end{bmatrix}' + I_4, \end{aligned} \quad (23)$$

where  $I_4$  is the  $4 \times 4$  identity matrix.

We first establish that  $\dot{F}(\theta)$  is not globally Lipschitz continuous. With  $\theta = (1, -1, W_3, W_3)$  and  $\phi = (1, -1, W_3, 0)$ , it is enough to find a lower bound for the first component of  $\dot{F}(\theta) - \dot{F}(\phi)$ , denoted by  $\dot{F}_1(\theta) - \dot{F}_1(\phi)$ . To this end,

$$|\dot{F}_1(\theta) - \dot{F}_1(\phi)| = \frac{0.5 W_3^2}{1 + \exp(-W_3^2)} \geq \frac{1}{4} |W_3 - 0|^2. \quad (24)$$

Thus,  $\dot{F}$  is not globally Lipschitz.

We now establish that  $F$  does not satisfy  $(L_0, L_1)$ -smoothness. That is, we show that there is no  $L_0, L_1 \geq 0$  such that  $\|\ddot{F}(\theta)\| \leq L_0 \|\dot{F}(\theta)\| + L_1$ , where the norms can be chosen arbitrarily owing to the equivalence of norms in finite-dimensional vector spaces. To see this, note that the Frobenius norm of  $\ddot{F}(\theta)$  is lower bounded by the absolute value of the  $[1, 1]$  entry. Using notation,

$$\frac{0.5 \exp(W_4 W_3 W_2 W_1)}{[1 + \exp(W_4 W_3 W_2 W_1)]^2} (W_4 W_3 W_2)^2 + 1 \leq \|\ddot{F}(\theta)\|_F. \quad (25)$$

Let  $\theta = (0, W_4, W_4, W_4)$ , then the lower bound is

$$\frac{1}{8} W_4^6 \leq \|\ddot{F}(\theta)\|_F. \quad (26)$$

Notice, for this same choice of  $\theta$ , the  $l^1$  norm of the gradient is bounded above by

$$\|\dot{F}(\theta)\|_1 \leq \frac{1}{4} |W_4|^3 + 3|W_4|. \quad (27)$$

For any choice of  $L_0, L_1 > 0$ , we conclude that there is a  $W_4$  sufficiently large such that, for this parametrization of  $\theta$ ,

$$L_0 \|\dot{F}(\theta)\| + L_1 \leq L_0 \left[ \frac{1}{4} |W_4|^3 + 3|W_4| \right] + L_1 < \frac{1}{8} W_4^6 \leq \|\ddot{F}(\theta)\|_F. \quad (28)$$

Thus, we see that no  $L_0$  nor  $L_1$  can exist that will satisfy the  $(L_0, L_1)$ -smooth assumption for all choices of  $\theta$ .

To show that the variance is not bounded, we study the variance of the first component of  $\dot{f}(\theta, X)$  which we denote by  $\dot{f}_1(\theta, X)$ . By direct calculation,

$$\mathbb{E} [(\dot{f}_1(\theta, X) - \dot{F}_1(\theta))^2] = \frac{1}{4} \frac{W_4^2 W_3^2 W_2^2}{[1 + \exp(W_4 W_3 W_2 W_1)]^2}. \quad (29)$$

We again consider  $\theta = (1, -1, W_3, W_3)$ , then the variance at this value of  $\theta$  is

$$\frac{1}{4} \frac{W_3^4}{[1 + \exp(-W_3^2)]^2} \geq \frac{1}{16} W_3^4. \quad (30)$$

Therefore, as  $W_3 \rightarrow \infty$ , the variance goes to infinity. That is, the variance of the stochastic gradients is unbounded.

On the other hand, the problem does satisfy our assumptions. In particular,

1. **Assumptions 1 and 3** are easily verified.
2. Given that  $\dot{F}$  is continuously differentiable, then compactness and continuity of the derivative of  $\dot{F}$  imply that it is locally Lipschitz continuous. Therefore, **Assumption 2** is satisfied.
3. Given the computation of the variance for the first component, we have  $\mathbb{E}[\dot{f}_1(\theta, X)^2]$  is

$$\frac{1}{4} \frac{W_4^2 W_3^2 W_2^2}{[1 + \exp(W_4 W_3 W_2 W_1)]^2} + \dot{F}_1(\theta)^2, \quad (31)$$

which is a continuous function. By repeating this argument for each component, we conclude that **Assumption 4** is satisfied.

### A.3 Recurrent Neural Network for Binary Classification

Consider observing one of two sequences  $(1, 0, 0, 0)$  or  $(0, 0, 0, 0)$  with equal probabilities, and suppose that each sequence corresponds to the label 1 or 0, respectively. Now consider **Fig. 2** to be a 1-dimensional linear recurrent neural network which reads each element of the sequence and uses a logistic output layer to predict either a label of one or zero. If we fix  $H_0 = 0$  and  $W_3 = 1$ , then the model predicts the probability of a 1 label as

$$\hat{y}(Z_0, Z_1, Z_2, Z_3) = \frac{\exp(W_1^3 W_2 Z_0)}{1 + \exp(W_1^3 W_2 Z_0)}. \quad (32)$$

If we use the binary cross entropy loss with  $\ell^2$  regularization, and let  $X = (Y, Z_0, Z_1, Z_2, Z_3)$  and  $\theta = (W_1, W_2)$  then

$$f(\theta, X) = -Y \log \hat{y}(Z_0, Z_1, Z_2, Z_3) - (1 - Y) \log[1 - \hat{y}(Z_0, Z_1, Z_2, Z_3)] + \frac{1}{2}(W_1^2 + W_2^2) \quad (33)$$

$$= -Y [W_1^3 W_2 Z_0 - \log(1 + \exp(W_1^3 W_2 Z_0))] + (1 - Y) \log(1 + \exp(W_1^3 W_2 Z_0)) + \frac{1}{2}(W_1^2 + W_2^2) \quad (34)$$

$$= -W_1^3 W_2 Z_0 Y + \log(1 + \exp(W_1^3 W_2 Z_0)) + \frac{1}{2}(W_1^2 + W_2^2), \quad (35)$$

and

$$\dot{f}(\theta, X) = \begin{bmatrix} -3W_1^2 W_2 Z_0 Y + \frac{3W_1^2 W_2 Z_0 \exp(W_1^3 W_2 Z_0)}{1 + \exp(W_1^3 W_2 Z_0)} + W_1 \\ -W_1^3 Z_0 Y + \frac{W_1^3 Z_0 \exp(W_1^3 W_2 Z_0)}{1 + \exp(W_1^3 W_2 Z_0)} + W_2 \end{bmatrix} \quad (36)$$

Taking the expectations, we compute

$$F(\theta) = \frac{1}{2} [\log(2) + \log(1 + \exp(W_1^3 W_2)) - W_1^3 W_2 + W_1^2 + W_2^2], \quad (37)$$

and

$$\dot{F}(\theta) = \begin{bmatrix} \frac{-3W_1^2 W_2}{2} \frac{1}{1 + \exp(W_1^3 W_2)} + W_1 \\ \frac{-W_1^3}{2} \frac{1}{1 + \exp(W_1^3 W_2)} + W_2 \end{bmatrix}. \quad (38)$$

Taking another derivative and letting  $\ddot{F}(\theta) = \nabla^2 F(\psi)|_{\psi=\theta}$ ,

$$\ddot{F}(\theta) = \begin{bmatrix} \frac{9W_1^4 W_2^2 \exp(W_1^3 W_2)}{2(1+\exp(W_1^3 W_2))^2} - \frac{3W_1 W_2}{1+\exp(W_1^3 W_2)} + 1 & \frac{3W_1^5 W_2 \exp(W_1^3 W_2)}{2(1+\exp(W_1^3 W_2))^2} - \frac{3W_1^2}{2} \frac{1}{1+\exp(W_1^3 W_2)} \\ \frac{3W_1^5 W_2 \exp(W_1^3 W_2)}{2(1+\exp(W_1^3 W_2))^2} - \frac{3W_1^2}{2} \frac{1}{1+\exp(W_1^3 W_2)} & \frac{W_1^6 \exp(W_1^3 W_2)}{2(1+\exp(W_1^3 W_2))^2} + 1 \end{bmatrix}. \quad (39)$$

We first establish that  $\dot{F}$  is not globally Lipschitz continuous. Notice, if we set  $W_2 = 1$ , then the first and second component of  $\dot{F}(\theta)$  are proportional to  $-W_1^2$  and  $-W_1^3$  respectively, which are not globally Lipschitz continuous functions.

We now show that  $F$  also does not satisfy  $(L_0, L_1)$ -smoothness. Notice that, using the bottom right entry of  $\ddot{F}(\theta)$ ,

$$\frac{W_1^6 \exp(W_1^3 W_2)}{2(1 + \exp(W_1^3 W_2))^2} < \|\ddot{F}(\theta)\|_F, \quad (40)$$

and

$$\|\dot{F}(\theta)\|_1 \leq \frac{3W_1^2 |W_2| + |W_1|^3}{2[1 + \exp(W_1^3 W_2)]} + |W_1| + |W_2|. \quad (41)$$

If we choose  $W_2 = 0$ , then, for any  $L_0, L_1 \geq 0$  there exists a  $|W_1|$  sufficiently large such that

$$\frac{W_1^6}{8} < \|\ddot{F}(\theta)\|_F \not\leq L_0 \|\dot{F}(\theta)\|_1 + L_1 \leq L_0 \left( \frac{|W_1|^3}{4} + |W_1| \right) + L_1. \quad (42)$$

Hence,  $F(\theta)$  is not  $(L_0, L_1)$ -smooth.

Moreover, computing the trace of the variance of  $\dot{f}(\theta, X)$ , we recover

$$\mathbb{E} \left[ \|\dot{f}(\theta, X) - \dot{F}(\theta)\|_2^2 \right] = \left( \frac{3W_1^2 W_2}{2[1 + \exp(W_1^3 W_2)]} \right)^2 + \left( \frac{W_1^3}{2[1 + \exp(W_1^3 W_2)]} \right)^2, \quad (43)$$

which does not satisfy a bounded variance assumption (choose  $W_2 = 0$  and let  $W_1 \rightarrow \infty$ ). Thus, any work that makes either a global Lipschitz bound on the gradient or a global noise model bound fails to apply to this simple recurrent neural network training problem.

On the other hand, the problem does satisfy our assumptions. In particular,

1. **Assumptions 1** and **3** are easily verified.
2. Given that  $\dot{F}$  is continuously differentiable, then compactness and continuity of the derivative of  $\dot{F}$  imply that it is locally Lipschitz continuous. Therefore, **Assumption 2** is satisfied.
3. Moreover,

$$\mathbb{E} \left[ \|\dot{f}(\theta, X)\|_2^2 \right] = \left( \frac{3W_1^2 W_2}{2[1 + \exp(W_1^3 W_2)]} \right)^2 + \left( \frac{W_1^3}{2[1 + \exp(W_1^3 W_2)]} \right)^2 + \|\dot{F}(\theta)\|_2^2, \quad (44)$$

which is a continuous function. Hence, **Assumption 4** is satisfied.

#### A.4 Poisson Regression

Here, we consider the task of estimating a Poisson regression model for data  $X = (Y, Z)$  where  $Y$  is a count response variable and  $Z$  is the covariate. To make this problem simpler, we will assume that both  $Y$  and  $Z$  are independent Poisson random variables with mean 1, which implies that the parameter in the model,  $\theta^* = 0$ . If we use a likelihood framework, then, up to a constant depending on  $Y$ ,

$$f(\theta, X) = -YZ\theta + \exp(\theta Z), \quad (45)$$

and

$$\dot{f}(\theta, X) = -YZ + Z \exp(\theta Z). \quad (46)$$

From this, we compute

$$F(\theta) = -\theta + \exp(\exp(\theta) - 1), \quad (47)$$

$$\dot{F}(\theta) = -1 + \exp(\exp(\theta) + \theta - 1), \quad (48)$$

and, letting  $\nabla^2 F(\psi)|_{\psi=\theta} = \ddot{F}(\theta)$ ,

$$\ddot{F}(\theta) = (\exp(\theta) + 1) \exp(\exp(\theta) + \theta - 1). \quad (49)$$

We begin by showing that  $\dot{F}(\theta)$  is not globally Lipschitz continuous. To do so, for any  $\theta > 0$ , note

$$|\dot{F}(\theta) - \dot{F}(0)| = \exp(\exp(\theta) + \theta - 1) - 1 > \exp(\theta) - 1 \geq \theta + \theta^2/2. \quad (50)$$

Thus, for any  $L > 0$  there exists a  $\theta > 0$  such that  $|\dot{F}(\theta) - \dot{F}(0)| > L|\theta|$ .

We now show that  $F(\theta)$  does not satisfy the  $(L_0, L_1)$ -smooth assumption. Note, for  $\theta \geq 0$ ,

$$\exp(\exp(\theta) + 2\theta - 1) < \ddot{F}(\theta), \quad (51)$$

and

$$\dot{F}(\theta) < \exp(\exp(\theta) + \theta - 1). \quad (52)$$

It follows that for any  $L_0, L_1 > 0$ , there exists a  $\theta > 0$  such that  $L_0|\dot{F}(\theta)| + L_1 < \ddot{F}(\theta)$ .

For the noise, we compute the second moment of  $\dot{f}(\theta, X)$ . That is,

$$\mathbb{E} [\dot{f}(\theta, X)^2] = \mathbb{E} [Y^2 Z^2 - 2Y Z^2 \exp(\theta Z) + Z^2 \exp(2\theta Z)] \quad (53)$$

$$= 4 - 2\mathbb{E} [Z^2 \exp(\theta Z)] + \mathbb{E} [Z^2 \exp(2\theta Z)] \quad (54)$$

$$= 4 - 2(\exp(\theta) + 1) \exp(\exp(\theta) + \theta - 1) + (\exp(2\theta) + 1) \exp(\exp(2\theta) + 2\theta - 1). \quad (55)$$

It is clear from this calculation that the variance (computed by subtracting off  $\dot{F}(\theta)^2$ ) will diverge as  $\theta$  tends to infinity. To show that [Bottou et al., 2018, Assumption 4.3c] does not apply, it is enough to show that its generalization, [Khaled and Richtárik, 2020, Assumption 2] does not apply. To this end, we must show that there does not exist a  $C_0, C_1, C_2 \geq 0$  such that,  $\forall \theta$ ,

$$\mathbb{E} [\dot{f}(\theta, X)^2] \leq C_0 + C_1 F(\theta) + C_2 |\dot{F}(\theta)|^2. \quad (56)$$

From our calculations, it is easy to verify that  $F(\theta)$  and  $\dot{F}(\theta)$  are dominated by  $\exp(2 \exp(\theta))$ , and that the second moment of the stochastic gradient is bounded from below by  $\exp(\exp(2\theta))$  for  $\theta \geq \log(4)$ . Hence, for any  $C_0, C_1, C_2 \geq 0$ , there exists  $\theta$  sufficiently large such that

$$C_0 + C_1 F(\theta) + C_2 |\dot{F}(\theta)|^2 \leq C_0 + (C_1 + C_2) \exp(2 \exp(\theta)) < \exp(\exp(2\theta)) \leq \mathbb{E} [\dot{f}(\theta, X)^2]. \quad (57)$$

Thus, [Bottou et al., 2018, Assumption 4.3c] and [Khaled and Richtárik, 2020, Assumption 2] do not hold.

On the other hand, the problem does satisfy our assumptions. In particular,

1. **Assumptions 1** and **3** are easily verified.
2. Given that  $\ddot{F}$  is continuous, **Assumption 2** is satisfied.
3. Moreover, we can use the calculated value  $\mathbb{E}[\dot{f}(\theta, X)^2]$ , which is a continuous function, as  $G(\theta)$  to satisfy **Assumption 4**.

## A.5 Noiseless Feed Forward Network for Binary Classification

Out of interest, we reconsider the second example but construct a different data distribution that produces noiseless stochastic gradient. Consider the binary classification problem with label  $Y$  and feature  $Z$  where  $(Y, Z) = (0, -1)$  with probability  $1/2$  and  $(Y, Z) = (1, 1)$  with probability  $1/2$ . We solve this classification problem using the network shown in Fig. 1 with  $\sigma$  linear and  $\varphi$  sigmoid.

We will train this model using the binary cross entropy loss function. Letting  $X = (Y, Z)$  and  $\theta = (W_1, W_2, W_3, W_4)$ ,

$$f(\theta, X) = -Y \log(\hat{y}) - (1 - Y) \log(1 - \hat{y}) + \frac{1}{2} \sum_{i=1}^4 W_i^2, \quad (58)$$

and

$$\hat{y} = \frac{1}{1 + \exp(-W_4 W_3 W_2 W_1 Z)}. \quad (59)$$

Moreover,

$$\dot{f}(\theta, X) = Z(\hat{y} - Y) \begin{bmatrix} W_4 W_3 W_2 \\ W_4 W_3 W_1 \\ W_4 W_2 W_1 \\ W_3 W_2 W_1 \end{bmatrix} + \begin{bmatrix} W_1 \\ W_2 \\ W_3 \\ W_4 \end{bmatrix}, \quad (60)$$

and, consequently,

$$\dot{F}(\theta) = \frac{-1}{1 + \exp(W_4 W_3 W_2 W_1)} \begin{bmatrix} W_4 W_3 W_2 \\ W_4 W_3 W_1 \\ W_4 W_2 W_1 \\ W_3 W_2 W_1 \end{bmatrix} + \begin{bmatrix} W_1 \\ W_2 \\ W_3 \\ W_4 \end{bmatrix}. \quad (61)$$

We first establish that  $\dot{F}(\theta)$  is not globally Lipschitz continuous. With  $\theta = (1, -1, W_3, W_3)$  and  $\phi = (1, 0, 0, 0)$ , it is enough to find a lower bound for the first component of  $\dot{F}(\theta) - \dot{F}(\phi)$ , denoted by  $\dot{F}_1(\theta) - \dot{F}_1(\phi)$ . To this end,

$$|\dot{F}_1(\theta) - \dot{F}_1(\phi)| = \frac{W_3^2}{1 + \exp(-W_3^2)} \geq \frac{1}{2} |W_3 - 0|^2. \quad (62)$$

Thus,  $\dot{F}$  is not globally Lipschitz.

On the other hand, the problem does satisfy our assumptions. In particular,

1. **Assumptions 1** and **3** are easily verified.
2. Given that  $\dot{F}$  is continuously differentiable, then compactness and continuity of the derivative of  $\dot{F}$  imply that it is locally Lipschitz continuous. Therefore, **Assumption 2** is satisfied.
3. Moreover,  $\dot{f}(\theta, Z) = \dot{F}(\theta)$ —that is, there  $\dot{f}(\theta, Z)$  has zero variance for the distribution that we have constructed. Therefore,

$$\mathbb{E} \left[ \left\| \dot{f}(\theta, X) \right\|_2^2 \right] = \left\| \dot{F}(\theta) \right\|_2^2, \quad (63)$$

which is a continuous function. Hence, **Assumption 4** is satisfied.

## B Technical Lemmas

**Lemma 5 (Lemma 1).** Suppose **Assumptions 1** and **2** hold. Then, for any  $\theta, \varphi \in \mathbb{R}^p$ ,

$$F(\varphi) - F_{l.b.} \leq F(\theta) - F_{l.b.} + \dot{F}(\theta)'(\varphi - \theta) + \frac{L(\theta, \varphi)}{1 + \alpha} \|\varphi - \theta\|_2^{1+\alpha}. \quad (64)$$

*Proof.* By Taylor's theorem,

$$F(\varphi) - F_{l.b.} = F(\theta) - F_{l.b.} + \int_0^1 \dot{F}(\theta + t(\varphi - \theta))'(\varphi - \theta) dt. \quad (65)$$

Now, add and subtract  $\dot{F}(\theta)$  to  $\dot{F}(\theta + t(\varphi - \theta))$  in the integral, then apply **Assumption 2**. By **Definition 1**,

$$\left\| \dot{F}(\theta + t(\varphi - \theta)) - \dot{F}(\theta) \right\|_2 \leq L(\theta, \varphi) t^\alpha \|\theta - \varphi\|_2^\alpha. \quad (66)$$

We conclude,

$$F(\varphi) - F_{l.b.} \leq F(\theta) - F_{l.b.} + \dot{F}(\theta)'(\varphi - \theta) + L(\theta, \varphi) \|\varphi - \theta\|_2^{1+\alpha} \int_0^1 t^\alpha dt. \quad (67)$$

By computing the integral, the result follows.  $\square$

**Lemma 6.** Suppose  $\{M_k : k + 1 \in \mathbb{N}\}$  satisfy *Properties 1 and 4*. Then  $\forall C > 0, \exists K \in \mathbb{N}$  such that  $\forall k \geq K$ ,

$$\lambda_{\min}(M_k) - \frac{C}{2} \lambda_{\max}(M_k)^{1+\alpha} \geq \frac{1}{2} \lambda_{\min}(M_k). \quad (68)$$

*Proof.* Fix  $C > 0$ . Rearranging the conclusion, we see that it is equivalent to prove that  $\exists K \in \mathbb{N}$  such that  $\forall k \geq K, 1/C \geq \lambda_{\max}(M_k)^\alpha \kappa(M_k)$ . This follows from *Property 4*.  $\square$

**Lemma 7.** For any  $\theta \in \mathbb{R}^p, v \in \mathbb{R}, L > 0$  and  $\alpha \in (0, 1]$ ,

$$\frac{L}{1+\alpha} v^{1+\alpha} - \|\dot{F}(\theta)\|_2 v \geq -\frac{\alpha}{1+\alpha} \left[ \frac{\|\dot{F}(\theta)\|_2^{1+\alpha}}{L} \right]^{1/\alpha}. \quad (69)$$

*Proof.* If we minimize the left hand side of the inequality, we see that a minimum value occurs when  $v^\alpha = \|\dot{F}(\theta)\|_2 / L \geq 0$ . Solving for  $v$  and plugging this back into the left hand side, we conclude that the inequality holds.  $\square$

## C Global Convergence Analysis

We begin by first deriving a recursive relationship between the optimality gap at iteration  $k + 1$  and the optimality gap at iteration  $k$  on the events  $\{\mathcal{B}_j(R)\}$  as defined in (8) for arbitrary  $R \geq 0$ . Using this result, we then provide an analysis of the convergence of the objective function. Then, we turn our attention to the gradient function. Note,  $B(\theta, r)$  is the open ball around  $\theta$  of radius  $r$ .

### C.1 A Recursive Relationship

**Lemma 8 (Lemma 2).** Let  $\{M_k\}$  satisfy *Property 1*. Suppose *Assumptions 1 to 4* hold. Let  $\{\theta_k\}$  satisfy (5). Then,  $\forall R \geq 0$ ,

$$\begin{aligned} \mathbb{E} [ [F(\theta_{k+1}) - F_{l.b.}] \mathbf{1} [\mathcal{B}_{k+1}(R)] | \mathcal{F}_k ] &\leq [F(\theta_k) - F_{l.b.}] \mathbf{1} [\mathcal{B}_k(R)] \\ &\quad - \lambda_{\min}(M_k) \left\| \dot{F}(\theta_k) \right\|_2^2 \mathbf{1} [\mathcal{B}_k(R)] + \frac{L_{R+1} + \partial F_R}{1+\alpha} \lambda_{\max}(M_k)^{1+\alpha} G_R, \end{aligned} \quad (70)$$

where  $G_R = \sup_{\theta \in \overline{B(0, R)}} G(\theta) < \infty$  with  $G(\theta)$ ; and  $\partial F_R = \sup_{\theta \in \overline{B(0, R)}} \|\dot{F}(\theta)\|_2 (1+\alpha) < \infty$ .

*Proof.* Fix  $R \geq 0$ . For any  $k + 1 \in \mathbb{N}$ , the definition of local Hölder continuity implies that  $L_{R+1}$  is well defined (see *Definition 1*). Therefore, *Lemma 1* implies

$$\begin{aligned} &[F(\theta_{k+1}) - F_{l.b.}] \mathbf{1} [\mathcal{B}_{k+1}(R+1)] \\ &\leq \left( [F(\theta_k) - F_{l.b.}] + \dot{F}(\theta_k)'(\theta_{k+1} - \theta_k) + \frac{L_{R+1}}{1+\alpha} \|\theta_{k+1} - \theta_k\|_2^{1+\alpha} \right) \mathbf{1} [\mathcal{B}_{k+1}(R+1)]. \end{aligned} \quad (71)$$

Now, since  $\overline{B(0, R)} \subset \overline{B(0, R+1)}$ , it also holds true that

$$\begin{aligned} &[F(\theta_{k+1}) - F_{l.b.}] \mathbf{1} [\mathcal{B}_{k+1}(R)] \\ &\leq \left( [F(\theta_k) - F_{l.b.}] + \dot{F}(\theta_k)'(\theta_{k+1} - \theta_k) + \frac{L_{R+1}}{1+\alpha} \|\theta_{k+1} - \theta_k\|_2^{1+\alpha} \right) \mathbf{1} [\mathcal{B}_{k+1}(R)]. \end{aligned} \quad (72)$$

Our goal now is to replace  $\mathcal{B}_{k+1}(R)$  on the right hand side by  $\mathcal{B}_k(R)$ . However, there is a technical difficulty which we must address. First, it follows from the preceding inequality that

$$\begin{aligned}
& [F(\theta_{k+1}) - F_{l.b.}] \mathbf{1}[\mathcal{B}_{k+1}(R)] \\
& \leq \left( [F(\theta_k) - F_{l.b.}] + \dot{F}(\theta_k)'(\theta_{k+1} - \theta_k) + \frac{L_{R+1}}{1+\alpha} \|\theta_{k+1} - \theta_k\|_2^{1+\alpha} \right) \\
& \quad \times \left( \mathbf{1}[\mathcal{B}_{k+1}(R)] - \mathbf{1}[\mathcal{B}_k(R)] \right) \\
& \quad + \left( [F(\theta_k) - F_{l.b.}] + \dot{F}(\theta_k)'(\theta_{k+1} - \theta_k) + \frac{L_{R+1}}{1+\alpha} \|\theta_{k+1} - \theta_k\|_2^{1+\alpha} \right) \mathbf{1}[\mathcal{B}_k(R)].
\end{aligned} \tag{73}$$

The first term on the right hand side of the inequality only contributes meaningfully if it is positive. Since  $\mathbf{1}[\mathcal{B}_k(R)] \geq \mathbf{1}[\mathcal{B}_{k+1}(R)]$ , then two statements hold: (i)  $\mathbf{1}[\mathcal{B}_k(R)] \mathbf{1}[\mathcal{B}_{k+1}(R)] = \mathbf{1}[\mathcal{B}_{k+1}(R)]$ ; and (ii) the first term of the right hand side of (73) is positive if and only if

$$\left( [F(\theta_k) - F_{l.b.}] + \dot{F}(\theta_k)'(\theta_{k+1} - \theta_k) + \frac{L_{R+1}}{1+\alpha} \|\theta_{k+1} - \theta_k\|_2^{1+\alpha} \right) \mathbf{1}[\mathcal{B}_k(R)] < 0. \tag{74}$$

By the choice of  $L_{R+1}$ , **Assumption 1** and **Lemma 1** imply that if (74) occurs, then  $\|\theta_{k+1}\|_2 > R + 1 \geq \|\theta_k\|_2 + 1$ . By the reverse triangle inequality and (5), if (74) occurs, then  $\|M_k \dot{f}(\theta_k, X_{k+1})\|_2 \geq 1$ . Hence,

$$\begin{aligned}
& \left( [F(\theta_k) - F_{l.b.}] + \dot{F}(\theta_k)'(\theta_{k+1} - \theta_k) + \frac{L_{R+1}}{1+\alpha} \|\theta_{k+1} - \theta_k\|_2^{1+\alpha} \right) \\
& \quad \times \left( \mathbf{1}[\mathcal{B}_{k+1}(R)] - \mathbf{1}[\mathcal{B}_k(R)] \right) \\
& \leq \left( -[F(\theta_k) - F_{l.b.}] - \dot{F}(\theta_k)'(\theta_{k+1} - \theta_k) - \frac{L_{R+1}}{1+\alpha} \|\theta_{k+1} - \theta_k\|_2^{1+\alpha} \right) \\
& \quad \times \left( \mathbf{1}[\mathcal{B}_k(R)] - \mathbf{1}[\mathcal{B}_{k+1}(R)] \right) \mathbf{1}[\mathcal{B}_k(R)] \mathbf{1} \left[ \|M_k \dot{f}(\theta_k, X_{k+1})\|_2 \geq 1 \right].
\end{aligned} \tag{75}$$

We now compute another coarse upper bound for this inequality. Note, by **Assumption 1** and Cauchy-Schwarz,

$$\begin{aligned}
& \left( -[F(\theta_k) - F_{l.b.}] - \dot{F}(\theta_k)'(\theta_{k+1} - \theta_k) - \frac{L_{R+1}}{1+\alpha} \|\theta_{k+1} - \theta_k\|_2^{1+\alpha} \right) \\
& \quad \times \left( \mathbf{1}[\mathcal{B}_k(R)] - \mathbf{1}[\mathcal{B}_{k+1}(R)] \right) \mathbf{1}[\mathcal{B}_k(R)] \mathbf{1} \left[ \|M_k \dot{f}(\theta_k, X_{k+1})\|_2 \geq 1 \right]
\end{aligned} \tag{76}$$

$$\leq \left\| \dot{F}(\theta_k) \right\|_2 \left\| M_k \dot{f}(\theta_k, X_{k+1}) \right\|_2 \mathbf{1}[\mathcal{B}_k(R)] \mathbf{1} \left[ \|M_k \dot{f}(\theta_k, X_{k+1})\|_2 \geq 1 \right] \tag{77}$$

$$\leq \left\| \dot{F}(\theta_k) \right\|_2 \left\| M_k \dot{f}(\theta_k, X_{k+1}) \right\|_2^{1+\alpha} \mathbf{1}[\mathcal{B}_k(R)] \tag{78}$$

$$\leq \frac{\partial F_R}{1+\alpha} \left\| M_k \dot{f}(\theta_k, X_{k+1}) \right\|_2^{1+\alpha} \mathbf{1}[\mathcal{B}_k(R)], \tag{79}$$

where  $\partial F_R = \sup_{\theta \in \overline{B(0,R)}} \|\dot{F}(\theta)\|_2(1+\alpha) < \infty$  given that  $\|\dot{F}(\theta)\|_2$  is a continuous function of  $\theta$ .

Applying this inequality to (73), we conclude

$$\begin{aligned}
& [F(\theta_{k+1}) - F_{l.b.}] \mathbf{1}[\mathcal{B}_{k+1}(R)] \\
& \leq \left( [F(\theta_k) - F_{l.b.}] - \dot{F}(\theta_k)' M_k \dot{f}(\theta_k, X_{k+1}) + \frac{L_{R+1} + \partial F_R}{1+\alpha} \left\| M_k \dot{f}(\theta_k, X_{k+1}) \right\|_2^{1+\alpha} \right) \\
& \quad \times \mathbf{1}[\mathcal{B}_k(R)].
\end{aligned} \tag{80}$$

By **Assumption 3**,

$$\begin{aligned}
& \mathbb{E} \left[ [F(\theta_{k+1}) - F_{l.b.}] \mathbf{1}[\mathcal{B}_{k+1}(R)] \mid \mathcal{F}_k \right] \\
& \leq \left( [F(\theta_k) - F_{l.b.}] - \dot{F}(\theta_k)' M_k \dot{F}(\theta_k) + \frac{L_{R+1} + \partial F_R}{1+\alpha} \mathbb{E} \left[ \left\| M_k \dot{f}(\theta_k, X_{k+1}) \right\|_2^{1+\alpha} \mid \mathcal{F}_k \right] \right) \\
& \quad \times \mathbf{1}[\mathcal{B}_k(R)].
\end{aligned} \tag{81}$$

Using [Property 1](#) and [Assumption 4](#),

$$\begin{aligned} & \mathbb{E} [ [F(\theta_{k+1}) - F_{l.b.}] \mathbf{1} [\mathcal{B}_{k+1}(R)] | \mathcal{F}_k ] \\ & \leq \left( [F(\theta_k) - F_{l.b.}] - \lambda_{\min}(M_k) \left\| \dot{F}(\theta_k) \right\|_2^2 + \frac{L_{R+1} + \partial F_R}{1 + \alpha} \lambda_{\max}(M_k)^{1+\alpha} G(\theta_k) \right) \mathbf{1} [\mathcal{B}_k(R)]. \end{aligned} \quad (82)$$

By [Assumption 4](#),  $G$  is upper semicontinuous and  $\overline{B(0, R)}$  is compact, which implies that  $G_R$  is well defined and finite. The result follows.  $\square$

## C.2 Objective Function Analysis

**Corollary 1.** *Let  $\{\theta_k\}$  be defined as in (5) satisfying [Properties 1](#) and [2](#). Suppose [Assumptions 1](#) to [4](#) hold. Then, there exists a finite random variable  $F_{\lim}$  such that on the event  $\{\sup_k \|\theta_k\|_2 < \infty\}$ ,  $\lim_{k \rightarrow \infty} F(\theta_k) = F_{\lim}$  with probability one.*

*Proof.* By [Lemma 2](#), for every  $R \geq 0$ ,

$$\begin{aligned} & \mathbb{E} [ [F(\theta_{k+1}) - F_{l.b.}] \mathbf{1} [\mathcal{B}_{k+1}(R)] | \mathcal{F}_k ] \\ & \leq [F(\theta_k) - F_{l.b.}] \mathbf{1} [\mathcal{B}_k(R)] + \frac{(L_{R+1} + \partial F_R) G_R}{1 + \alpha} \lambda_{\max}(M_k)^{1+\alpha}. \end{aligned} \quad (83)$$

By [Neveu and Speed \[1975, Exercise II.4\]](#) (cf. [Robbins and Siegmund \[1971\]](#)) and [Property 2](#),  $\lim_{k \rightarrow \infty} [F(\theta_k) - F_{l.b.}] \mathbf{1} [\mathcal{B}_k(R)]$  converges to a finite random variable with probability one. Since  $R \geq 0$  is arbitrary, we conclude that there exists a finite random variable  $F_{\lim}$  such that the set  $\{\sup_k \|\theta_k\|_2 \leq R\}$  is a subset of  $\{\lim_k F(\theta_k) = F_{\lim}\}$  up to a measure zero set. Since the countable union of measure zero sets has measure zero,

$$\left\{ \sup_k \|\theta_k\|_2 < \infty \right\} = \bigcup_{R \in \mathbb{N}} \left\{ \sup_k \|\theta_k\|_2 \leq R \right\} \subset \left\{ \lim_{k \rightarrow \infty} F(\theta_k) = F_{\lim} \right\}, \quad (84)$$

up to a measure zero set. The result follows.  $\square$

## C.3 Gradient Function Analysis

We now prove that the gradient norm evaluated at SGD's iterates must, repeatedly, get arbitrarily close to zero.

**Lemma 9.** *Let  $\{\theta_k\}$  be defined as in (5) satisfying [Properties 1](#) to [3](#). Suppose [Assumptions 1](#) to [4](#) hold. Then,  $\forall R \geq 0$  and for all  $\delta > 0$ ,*

$$\mathbb{P} \left[ \left\| \dot{F}(\theta_k) \right\|_2^2 \mathbf{1} [\mathcal{B}_k(R)] \leq \delta, \text{ i.o.} \right] = 1. \quad (85)$$

*Proof.* By [Lemma 2](#),

$$\begin{aligned} & \lambda_{\min}(M_k) \mathbb{E} \left[ \left\| \dot{F}(\theta_k) \right\|_2^2 \mathbf{1} [\mathcal{B}_k(R)] \right] \leq \mathbb{E} [ [F(\theta_k) - F_{l.b.}] \mathbf{1} [\mathcal{B}_k(R)] ] \\ & \quad - \mathbb{E} [ [F(\theta_{k+1}) - F_{l.b.}] \mathbf{1} [\mathcal{B}_{k+1}(R)] ] + \frac{(L_{R+1} + \partial F_R) G_R}{1 + \alpha} \lambda_{\max}(M_k)^{1+\alpha}. \end{aligned} \quad (86)$$

Taking the sum of this equation for all  $k$  from 0 to  $j \in \mathbb{N}$ , we have

$$\begin{aligned} & \sum_{k=0}^j \lambda_{\min}(M_k) \mathbb{E} \left[ \left\| \dot{F}(\theta_k) \right\|_2^2 \mathbf{1} [\mathcal{B}_k(R)] \right] \leq [F(\theta_0) - F_{l.b.}] \mathbf{1} [\mathcal{B}_0(R)] \\ & \quad - \mathbb{E} [ [F(\theta_{j+1}) - F_{l.b.}] \mathbf{1} [\mathcal{B}_{j+1}(R)] ] + \frac{(L_{R+1} + \partial F_R) G_R}{1 + \alpha} \sum_{k=0}^j \lambda_{\max}(M_k)^{1+\alpha}. \end{aligned} \quad (87)$$

By [Assumption 1](#) and [Property 2](#), the right hand side is bounded by

$$[F(\theta_0) - F_{l.b.}] \mathbf{1} [\mathcal{B}_0(R)] + \frac{(L_{R+1} + \partial F_R) G_R}{1 + \alpha} S, \quad (88)$$

which is finite. Therefore,  $\sum_{k=0}^{\infty} \lambda_{\min}(M_k) \mathbb{E}[\|\dot{F}(\theta_k)\|_2^2 \mathbf{1}[\mathcal{B}_k(R)]]$  is finite. Furthermore, by [Property 3](#),  $\liminf_k \mathbb{E}[\|\dot{F}(\theta_k)\|_2^2 \mathbf{1}[\mathcal{B}_k(R)]] = 0$ .

Now, for any  $\delta > 0$ , Markov's inequality implies that for all  $j + 1 \in \mathbb{N}$ , and for all  $k \geq j$

$$\mathbb{P} \left[ \bigcap_{k=j}^{\infty} \left\{ \left\| \dot{F}(\theta_k) \right\|_2^2 \mathbf{1}[\mathcal{B}_k(R)] > \delta \right\} \right] \leq \mathbb{P} \left[ \left\| \dot{F}(\theta_k) \right\|_2^2 \mathbf{1}[\mathcal{B}_k(R)] > \delta \right] \quad (89)$$

$$\leq \frac{1}{\delta} \mathbb{E} \left[ \left\| \dot{F}(\theta_k) \right\|_2^2 \mathbf{1}[\mathcal{B}_k(R)] \right]. \quad (90)$$

Since the last inequality holds for every  $k \geq j$ , then, in particular, for all  $j + 1 \in \mathbb{N}$ ,

$$\mathbb{P} \left[ \bigcap_{k=j}^{\infty} \left\{ \left\| \dot{F}(\theta_k) \right\|_2^2 \mathbf{1}[\mathcal{B}_k(R)] > \delta \right\} \right] \leq \frac{1}{\delta} \min_{j \leq k} \mathbb{E} \left[ \left\| \dot{F}(\theta_k) \right\|_2^2 \mathbf{1}[\mathcal{B}_k(R)] \right], \quad (91)$$

where the right hand side is zero because  $\liminf_k \mathbb{E}[\|\dot{F}(\theta_k)\|_2^2 \mathbf{1}[\mathcal{B}_k(R)]] = 0$ .

As the countable union of measure zero sets has measure zero, we conclude that for all  $\delta > 0$ ,

$$\mathbb{P} \left[ \left\| \dot{F}(\theta_k) \right\|_2^2 \mathbf{1}[\mathcal{B}_k(R)] \leq \delta, \text{ i.o.} \right] = 1. \quad (92)$$

□

Unfortunately, [Lemma 9](#) does not guarantee that the gradient norm will be captured within a region of zero. In order to prove this, we first show that it is not possible (i.e., a zero probability event) for the limit supremum and limit infimum of the gradients to be distinct.

**Lemma 10.** *Let  $\{\theta_k\}$  be defined as in [\(5\)](#) satisfying [Properties 1](#) and [2](#). Suppose [Assumptions 1](#) to [4](#) hold. Then,  $\forall R \geq 0$  and for all  $\delta > 0$ ,*

$$\mathbb{P} \left[ \left\| \dot{F}(\theta_{k+1}) \right\|_2 \mathbf{1}[\mathcal{B}_{k+1}(R)] > \delta, \left\| \dot{F}(\theta_k) \right\|_2 \mathbf{1}[\mathcal{B}_k(R)] \leq \delta, \text{ i.o.} \right] = 0. \quad (93)$$

*Proof.* Let  $\gamma > 0$ . Let  $L_R$  be as in [Definition 1](#), and  $G_R$  be as in [Lemma 2](#). Then, for  $\delta > 0$ ,

$$\mathbb{P} \left[ \left\| \dot{F}(\theta_{k+1}) \right\|_2 \mathbf{1}[\mathcal{B}_{k+1}(R)] \mathbf{1} \left[ \left\| \dot{F}(\theta_k) \right\|_2 \mathbf{1}[\mathcal{B}_k(R)] \leq \delta \right] > \delta + L_R \gamma^\alpha \right] \quad (94)$$

$$= \mathbb{P} \left[ \left( \left\| \dot{F}(\theta_{k+1}) \right\|_2 - \left\| \dot{F}(\theta_k) \right\|_2 + \left\| \dot{F}(\theta_k) \right\|_2 \right) \mathbf{1}[\mathcal{B}_{k+1}(R)] \right] \quad (95)$$

$$\times \mathbf{1} \left[ \left\| \dot{F}(\theta_k) \right\|_2 \mathbf{1}[\mathcal{B}_k(R)] \leq \delta \right] > \delta + L_R \gamma^\alpha \right]. \quad (96)$$

Using the reverse triangle inequality,  $\|\dot{F}(\theta_{k+1})\|_2 - \|\dot{F}(\theta_k)\|_2 \leq \|\dot{F}(\theta_{k+1}) - \dot{F}(\theta_k)\|_2$ . Now, making use of the restriction to  $\mathcal{B}_{k+1}(R)$ ,  $\|\dot{F}(\theta_{k+1}) - \dot{F}(\theta_k)\|_2 \leq L_R \|\theta_{k+1} - \theta_k\|_2^\alpha$ . Moreover, on  $\|\dot{F}(\theta_k)\|_2 \leq \delta$ ,  $\|\dot{F}(\theta_k)\|_2 \mathbf{1}[\mathcal{B}_{k+1}(R)] \leq \delta$ . Putting these two observations together,

$$\mathbb{P} \left[ \left( \left\| \dot{F}(\theta_{k+1}) \right\|_2 - \left\| \dot{F}(\theta_k) \right\|_2 + \left\| \dot{F}(\theta_k) \right\|_2 \right) \mathbf{1}[\mathcal{B}_{k+1}(R)] \right] \quad (97)$$

$$\times \mathbf{1} \left[ \left\| \dot{F}(\theta_k) \right\|_2 \mathbf{1}[\mathcal{B}_k(R)] \leq \delta \right] > \delta + L_R \gamma^\alpha \right] \quad (98)$$

$$\leq \mathbb{P} \left[ L_R \|\theta_{k+1} - \theta_k\|_2^\alpha \mathbf{1}[\mathcal{B}_{k+1}(R)] \mathbf{1} \left[ \left\| \dot{F}(\theta_k) \right\|_2 \mathbf{1}[\mathcal{B}_k(R)] \leq \delta \right] > L_R \gamma^\alpha \right] \quad (99)$$

$$= \mathbb{P} \left[ \left\| M_k \dot{f}(\theta_k, X_{k+1}) \right\|_2 \mathbf{1}[\mathcal{B}_{k+1}(R)] \mathbf{1} \left[ \left\| \dot{F}(\theta_k) \right\|_2 \mathbf{1}[\mathcal{B}_k(R)] \leq \delta \right] > \gamma \right]. \quad (100)$$

Now, using  $\mathbf{1}[\mathcal{B}_{k+1}(R)] \mathbf{1}[\|\dot{F}(\theta_k)\|_2 \mathbf{1}[\mathcal{B}_k(R)]] \leq \mathbf{1}[\mathcal{B}_k(R)]$ ,

$$\mathbb{P}\left[\left\|\dot{F}(\theta_k)\right\|_2 \mathbf{1}[\mathcal{B}_{k+1}(R)] \mathbf{1}[\|\dot{F}(\theta_k)\|_2 \mathbf{1}[\mathcal{B}_k(R)] \leq \delta] > \gamma\right] \quad (101)$$

$$\leq \mathbb{P}\left[\left\|\dot{F}(\theta_k)\right\|_2 \mathbf{1}[\mathcal{B}_k(R)] > \gamma\right] \quad (102)$$

$$\leq \mathbb{P}\left[\left\|\dot{F}(\theta_k)\right\|_2^{1+\alpha} \mathbf{1}[\mathcal{B}_k(R)] > \gamma^{1+\alpha}\right] \quad (103)$$

$$\leq \frac{1}{\gamma^{1+\alpha}} \|\dot{F}(\theta_k)\|_2^{1+\alpha} \mathbb{E}\left[\mathbb{E}\left[\left\|\dot{F}(\theta_k)\right\|_2^{1+\alpha} \middle| \mathcal{F}_k\right] \mathbf{1}[\mathcal{B}_k(R)]\right], \quad (104)$$

where the last inequality is a consequence of Markov's inequality,  $\|\dot{F}(\theta_k)\|_2 \leq \|\dot{F}(\theta_k)\|_2^{1+\alpha} \|\dot{F}(\theta_k)\|_2^{-\alpha}$ , and  $\mathbf{1}[\mathcal{B}_k(R)]$  being measurable with respect to  $\mathcal{F}_k$ .

By [Assumption 4](#),  $\mathbb{E}\left[\left\|\dot{F}(\theta_k)\right\|_2^{1+\alpha} \middle| \mathcal{F}_k\right] \leq G(\theta_k)$ . Moreover, on  $\mathcal{B}_k(R)$ ,  $G(\theta_k) \leq G_R$ . Using this in the expectation, we conclude

$$\mathbb{P}\left[\left\|\dot{F}(\theta_{k+1})\right\|_2 \mathbf{1}[\mathcal{B}_{k+1}(R)] \mathbf{1}[\|\dot{F}(\theta_k)\|_2 \mathbf{1}[\mathcal{B}_k(R)] \leq \delta] > \delta + L_R \gamma^\alpha\right] \leq \frac{1}{\gamma^{1+\alpha}} \|\dot{F}(\theta_k)\|_2^{1+\alpha} G_R. \quad (105)$$

By [Property 2](#), the sum of the last expression over all  $k+1 \in \mathbb{N}$  is finite. By the Borel-Cantelli lemma, for all  $R \geq 0$ ,  $\delta > 0$  and  $\gamma > 0$ ,

$$\mathbb{P}\left[\left\|\dot{F}(\theta_{k+1})\right\|_2 \mathbf{1}[\mathcal{B}_{k+1}(R)] > \delta + L_R \gamma^\alpha, \left\|\dot{F}(\theta_k)\right\|_2 \mathbf{1}[\mathcal{B}_k(R)] \leq \delta, i.o.\right] = 0. \quad (106)$$

Since this holds for any  $\gamma > 0$ , it will hold for every value in a sequence  $\gamma_n \downarrow 0$ . Since the countable union of measure zero events has measure zero, for any  $R \geq 0$  and  $\delta > 0$ ,

$$\mathbb{P}\left[\left\{\left\|\dot{F}(\theta_{k+1})\right\|_2 \mathbf{1}[\mathcal{B}_{k+1}(R)] > \delta, \left\|\dot{F}(\theta_k)\right\|_2 \mathbf{1}[\mathcal{B}_k(R)] \leq \delta, i.o.\right\} \cap \Omega_\delta^c\right] = 0, \quad (107)$$

where  $\Omega_\delta = \{\limsup_k \|\dot{F}(\theta_{k+1})\|_2 \mathbf{1}[\mathcal{B}_{k+1}(R)] = \delta\}$ .

We now show that  $\Omega_\delta$  is a probability zero event. Notice, by [Lemma 9](#) and the definition of  $\Omega_\delta$ ,

$$\Omega_\delta \subset \left\{\left\|\dot{F}(\theta_{k+1})\right\|_2 \mathbf{1}[\mathcal{B}_{k+1}(R)] > \delta/2, \left\|\dot{F}(\theta_k)\right\|_2 \mathbf{1}[\mathcal{B}_k(R)] \leq \delta/2, i.o.\right\} \cap \Omega_{\delta/2}^c, \quad (108)$$

up to a set of measure zero. By applying (107) with  $\delta/2$ ,  $\mathbb{P}[\Omega_\delta] = 0$ . The conclusion of the result follows.  $\square$

We now put together [Lemmas 9](#) and [10](#) to show that, on the event  $\{\sup_k \|\theta_k\|_2 < \infty\}$ ,  $\|\dot{F}(\theta_k)\|_2$  converges to 0 with probability one.

**Corollary 2.** *Let  $\{\theta_k\}$  be defined as in (5) satisfying [Properties 1 to 3](#). Suppose [Assumptions 1 to 4](#) hold. Then, on the event  $\{\sup_k \|\theta_k\|_2 < \infty\}$ ,  $\lim_{k \rightarrow \infty} \|\dot{F}(\theta_k)\|_2 = 0$ .*

*Proof.* For any  $R \geq 0$  and  $\delta > 0$ , [Lemma 9](#) implies

$$\begin{aligned} & \mathbb{P}\left[\left\|\dot{F}(\theta_{k+1})\right\|_2 \mathbf{1}[\mathcal{B}_{k+1}(R)] > \delta, i.o.\right] \\ &= \mathbb{P}\left[\left\{\left\|\dot{F}(\theta_{k+1})\right\|_2 \mathbf{1}[\mathcal{B}_{k+1}(R)] > \delta, i.o.\right\} \cap \left\{\left\|\dot{F}(\theta_k)\right\|_2 \mathbf{1}[\mathcal{B}_k(R)] \leq \delta, i.o.\right\}\right]. \end{aligned} \quad (109)$$

We see that this latter event is exactly,

$$\mathbb{P}\left[\left\|\dot{F}(\theta_{k+1})\right\|_2 \mathbf{1}[\mathcal{B}_{k+1}(R)] > \delta, \left\|\dot{F}(\theta_k)\right\|_2 \mathbf{1}[\mathcal{B}_k(R)] \leq \delta, i.o.\right], \quad (110)$$

which, by [Lemma 10](#), is zero with probability one. Therefore,  $\mathbb{P}[\|\dot{F}(\theta_{k+1})\|_2 \mathbf{1}[\mathcal{B}_{k+1}(R)] > \delta, i.o.]$  is zero. Letting  $\delta_n \downarrow 0$  and noting that the countable union of measure zero sets has measure zero, we conclude  $\mathbb{P}[\|\dot{F}(\theta_{k+1})\|_2 \mathbf{1}[\mathcal{B}_{k+1}(R)] > 0, i.o.] = 0$ .

Therefore, for all  $R \geq 0$ ,  $\{\sup_k \|\theta_k\|_2 \leq R\} \subset \{\lim_{k \rightarrow \infty} \|\dot{F}(\theta_k)\|_2 = 0\}$  up to a measure zero set. Since  $\{\sup_k \|\theta_k\|_2 < \infty\} = \cup_{R \in \mathbb{N}} \{\sup_k \|\theta_k\|_2 \leq R\}$ , the result follows.  $\square$

#### C.4 Capture Theorem

The final step in our proof is to study the event  $\{\sup_k \|\theta_k\| < \infty\}$ .

**Theorem 4 (Theorem 1).** *Let  $\{\theta_k\}$  be defined as in (5), and let  $\{M_k\}$  satisfy [Properties 1 and 2](#). If [Assumption 4](#) holds, then either  $\{\lim_{k \rightarrow \infty} \theta_k \text{ exists}\}$  or  $\{\liminf_{k \rightarrow \infty} \|\theta_k\|_2 = \infty\}$  must occur.*

*Proof.* Let  $\bar{\theta} \in \mathbb{R}^p$ . Fix  $R \geq 0$  and let  $\gamma > 0$ . Then,

$$\begin{aligned} & \mathbb{P} [\|\theta_{k+1} - \bar{\theta}\|_2 \geq R + \gamma, \|\theta_k - \bar{\theta}\|_2 \leq R] \\ &= \mathbb{P} [\|\theta_{k+1} - \bar{\theta}\|_2 \mathbf{1} [\|\theta_k - \bar{\theta}\|_2 \leq R] \geq R + \gamma] \end{aligned} \quad (111)$$

$$= \mathbb{P} [(\|\theta_{k+1} - \bar{\theta}\|_2 - \|\theta_k - \bar{\theta}\|_2 + \|\theta_k - \bar{\theta}\|_2) \mathbf{1} [\|\theta_k - \bar{\theta}\|_2 \leq R] \geq R + \gamma]. \quad (112)$$

Now,  $\|\theta_k - \bar{\theta}\|_2 \mathbf{1} [\|\theta_k - \bar{\theta}\|_2 \leq R] \leq R$ . Therefore,

$$\mathbb{P} [(\|\theta_{k+1} - \bar{\theta}\|_2 - \|\theta_k - \bar{\theta}\|_2 + \|\theta_k - \bar{\theta}\|_2) \mathbf{1} [\|\theta_k - \bar{\theta}\|_2 \leq R] \geq R + \gamma] \quad (113)$$

$$\leq \mathbb{P} [(\|\theta_{k+1} - \bar{\theta}\|_2 - \|\theta_k - \bar{\theta}\|_2) \mathbf{1} [\|\theta_k - \bar{\theta}\|_2 \leq R] + R \geq R + \gamma] \quad (114)$$

$$\leq \mathbb{P} [\|\theta_{k+1} - \theta_k\|_2 \mathbf{1} [\|\theta_k - \bar{\theta}\|_2 \leq R] \geq \gamma], \quad (115)$$

where the last line follows by applying the reverse triangle inequality. By using (5) and Markov's inequality,

$$\mathbb{P} [\|\theta_{k+1} - \theta_k\|_2 \mathbf{1} [\|\theta_k - \bar{\theta}\|_2 \leq R] \geq \gamma] \quad (116)$$

$$\leq \mathbb{P} \left[ \left\| M_k \dot{f}(\theta_k, X_{k+1}) \right\|_2 \mathbf{1} [\|\theta_k - \bar{\theta}\|_2 \leq R] \geq \gamma \right] \quad (117)$$

$$\leq \frac{1}{\gamma^{1+\alpha}} \|M_k\|_2^{1+\alpha} \mathbb{E} \left[ \mathbb{E} \left[ \left\| \dot{f}(\theta_k, X_{k+1}) \right\|_2^{1+\alpha} \middle| \mathcal{F}_k \right] \mathbf{1} [\|\theta_k - \bar{\theta}\|_2 \leq R] \right]. \quad (118)$$

By applying [Assumption 4](#),  $\mathbb{E} \left[ \left\| \dot{f}(\theta_k, X_{k+1}) \right\|_2^{1+\alpha} \middle| \mathcal{F}_k \right] \leq G(\theta_k)$ . Moreover, on  $\|\theta_k - \bar{\theta}\|_2 \leq R$ ,  $G(\theta_k) \leq \sup_{\theta: \|\theta\|_2 \leq R + \|\bar{\theta}\|_2} G(\theta) =: G_{R+\|\bar{\theta}\|_2} < \infty$  since  $G$  is upper semi-continuous. Combining these steps,

$$\mathbb{P} [\|\theta_{k+1} - \bar{\theta}\|_2 \geq R + \gamma, \|\theta_k - \bar{\theta}\|_2 \leq R] \leq \frac{1}{\gamma^{1+\alpha}} \|M_k\|_2^{1+\alpha} G_{R+\|\bar{\theta}\|_2}, \quad (119)$$

By [Property 2](#), we see that the sum of the probabilities is finite. Together with the Borel-Cantelli lemma,  $\forall R \geq 0, \forall \gamma > 0$ , and for all  $\bar{\theta} \in \mathbb{R}^p$ ,

$$\mathbb{P} [\|\theta_{k+1} - \bar{\theta}\|_2 \geq R + \gamma, \|\theta_k - \bar{\theta}\|_2 \leq R, \text{ i.o.}] = 0. \quad (120)$$

Since  $\gamma > 0$  is arbitrary, we can show that this statement holds for a countable sequence of  $\gamma_n \downarrow 0$ . Therefore,  $\forall R \geq 0$  and all  $\bar{\theta} \in \mathbb{R}^p$ ,

$$\mathbb{P} \left[ \limsup_k \|\theta_k - \bar{\theta}\|_2 > R, \liminf_k \|\theta_k - \bar{\theta}\|_2 \leq R \right] = 0. \quad (121)$$

Since  $R$  is arbitrary, we conclude that for any ordering of positive rational numbers,  $\{R_n\}$ ,  $\mathbb{P}[\limsup_k \|\theta_{k+1} - \bar{\theta}\|_2 > R_n, \liminf_k \|\theta_k - \bar{\theta}\|_2 \leq R_n] = 0$  for every  $n$ . Again, the countable union of measure zero sets is measure zero. Hence, we conclude that  $\mathbb{P}[\limsup_k \|\theta_k - \bar{\theta}\|_2 > \liminf_k \|\theta_k - \bar{\theta}\|_2] = 0$ . Thus, either  $\lim_k \|\theta_k - \bar{\theta}\|_2$  exists and is either infinite or finite.

Moreover, on the event that the limit is finite, since  $\bar{\theta}$  is arbitrary, we can choose  $p + 1$  distinct values of  $\bar{\theta}$  which do not belong to a hyperplane of dimension smaller than  $p$ , and, by triangulation, the  $\lim_k \theta_k$  converges to a fixed point (up to a set of measure zero).  $\square$

#### D Stability Analysis

We begin with a recursive relationship on the events  $\{\tau_j > k\}$ . We use this result to prove that the objective function converges to a finite limit on these events. Then, we use this result to conclude that the gradient function visits to a region of zero on the same event. Finally, we study this event to establish that the two statements above hold with probability one.

### D.1 A Recursive Relationship

**Lemma 11 (Lemma 3).** *Let  $\{M_k\}$  satisfy [Property 1](#). Suppose [Assumptions 1 to 4](#) hold. Let  $\{\theta_k\}$  satisfy [\(5\)](#). Then, for any  $j + 1 \in \mathbb{N}$  and  $k > j$ ,*

$$\begin{aligned} \mathbb{E}[(F(\theta_{k+1}) - F_{l.b.}) \mathbf{1}[\tau_j > k] | \mathcal{F}_k] &\leq \left( F(\theta_k) - F_{l.b.} - \dot{F}(\theta_k)' M_k \dot{F}(\theta_k) \right) \mathbf{1}[\tau_j > k - 1] \\ &\quad + \frac{\lambda_{\max}(M_k)^{1+\alpha}}{1 + \alpha} \left[ \mathcal{L}_\epsilon(\theta_k) G(\theta_k) + \alpha \left[ \frac{\|\dot{F}(\theta_k)\|_2^{1+\alpha}}{\mathcal{L}_\epsilon(\theta_k)} \right]^{1/\alpha} \right] \mathbf{1}[\tau_j > k - 1]. \end{aligned} \quad (122)$$

*Proof.* By the construction of  $\tau_j$ , when  $\tau_j > k$ , then

$$F(\theta_{k+1}) - F_{l.b.} \leq F(\theta_k) - F_{l.b.} + \dot{F}(\theta_k)'(\theta_{k+1} - \theta_k) + \frac{\mathcal{L}_\epsilon(\theta_k)}{1 + \alpha} \|\theta_{k+1} - \theta_k\|_2^{1+\alpha}. \quad (123)$$

Using this relationship and using  $\mathbf{1}[\tau_j > k] = \mathbf{1}[\tau_j > k - 1] - \mathbf{1}[\tau_j = k]$ ,

$$\begin{aligned} &\mathbb{E}[\{F(\theta_{k+1}) - F_{l.b.}\} \mathbf{1}[\tau_j > k] | \mathcal{F}_k] \\ &\leq \mathbb{E} \left[ \left\{ F(\theta_k) - F_{l.b.} + \dot{F}(\theta_k)'(\theta_{k+1} - \theta_k) + \frac{\mathcal{L}_\epsilon(\theta_k)}{1 + \alpha} \|\theta_{k+1} - \theta_k\|_2^{1+\alpha} \right\} \mathbf{1}[\tau_j > k - 1] \middle| \mathcal{F}_k \right] \\ &\quad - \mathbb{E} \left[ \left\{ F(\theta_k) - F_{l.b.} + \dot{F}(\theta_k)'(\theta_{k+1} - \theta_k) + \frac{\mathcal{L}_\epsilon(\theta_k)}{1 + \alpha} \|\theta_{k+1} - \theta_k\|_2^{1+\alpha} \right\} \mathbf{1}[\tau_j = k] \middle| \mathcal{F}_k \right] \end{aligned} \quad (124)$$

For the first term on the right hand side, we can apply [Assumptions 3 and 4](#), [Property 1](#), and [\(5\)](#) to calculate

$$\begin{aligned} &\mathbb{E} \left[ \left\{ F(\theta_k) - F_{l.b.} + \dot{F}(\theta_k)'(\theta_{k+1} - \theta_k) + \frac{\mathcal{L}_\epsilon(\theta_k)}{1 + \alpha} \|\theta_{k+1} - \theta_k\|_2^{1+\alpha} \right\} \mathbf{1}[\tau_j > k - 1] \middle| \mathcal{F}_k \right] \\ &\leq \left\{ F(\theta_k) - F_{l.b.} - \dot{F}(\theta_k)' M_k \dot{F}(\theta_k) + \frac{\lambda_{\max}(M_k)^{1+\alpha}}{1 + \alpha} \mathcal{L}_\epsilon(\theta_k) G(\theta_k) \right\} \mathbf{1}[\tau_j > k - 1]. \end{aligned} \quad (125)$$

For the second term on the right hand side of [\(124\)](#), we require two facts. The first fact is  $\mathbf{1}[\tau_j = k] \leq \mathbf{1}[\tau_j > k - 1]$  which implies  $\mathbf{1}[\tau_j = k] = \mathbf{1}[\tau_j = k] \mathbf{1}[\tau_j > k - 1]$ . For the second fact, the Cauchy-Schwarz inequality and [Lemma 7](#) imply

$$\begin{aligned} &-F(\theta_k)' M_k \dot{f}(\theta_k, X_{k+1}) + \frac{\mathcal{L}_\epsilon(\theta_k)}{1 + \alpha} \|M_k f(\theta_k, X_{k+1})\|_2^{1+\alpha} \\ &\geq -\|F(\theta_k)\|_2 \left\| M_k \dot{f}(\theta_k, X_{k+1}) \right\|_2 + \frac{\mathcal{L}_\epsilon(\theta_k)}{1 + \alpha} \|M_k f(\theta_k, X_{k+1})\|_2^{1+\alpha} \end{aligned} \quad (126)$$

$$\geq -\frac{\alpha}{1 + \alpha} \left[ \frac{\|\dot{F}(\theta_k)\|_2^{1+\alpha}}{\mathcal{L}_\epsilon(\theta_k)} \right]^{1/\alpha}. \quad (127)$$

Hence, using [\(5\)](#),

$$\begin{aligned} &-[F(\theta_k) - F_{l.b.}] - \dot{F}(\theta_k)'(\theta_{k+1} - \theta_k) - \frac{\mathcal{L}_\epsilon(\theta_k)}{1 + \alpha} \|\theta_{k+1} - \theta_k\|_2^{1+\alpha} \\ &\leq -[F(\theta_k) - F_{l.b.}] + \frac{\alpha}{1 + \alpha} \left[ \frac{\|\dot{F}(\theta_k)\|_2^{1+\alpha}}{\mathcal{L}_\epsilon(\theta_k)} \right]^{1/\alpha}. \end{aligned} \quad (128)$$

Putting together these two preceding facts together,

$$\begin{aligned}
& -\mathbb{E} \left[ \left\{ F(\theta_k) - F_{l.b.} + \dot{F}(\theta_k)'(\theta_{k+1} - \theta_k) + \frac{\mathcal{L}_\epsilon(\theta_k)}{1+\alpha} \|\theta_{k+1} - \theta_k\|_2^{1+\alpha} \right\} \mathbf{1}[\tau_j = k] \middle| \mathcal{F}_k \right] \\
& \leq \left\{ -[F(\theta_k) - F_{l.b.}] + \frac{\alpha}{1+\alpha} \left[ \frac{\|\dot{F}(\theta_k)\|_2^{1+\alpha}}{\mathcal{L}_\epsilon(\theta_k)} \right]^{1/\alpha} \right\} \mathbb{P}[\tau_j = k | \mathcal{F}_k] \mathbf{1}[\tau_j > k-1] \quad (129)
\end{aligned}$$

$$\leq \frac{\alpha \lambda_{\max}(M_k)^{1+\alpha}}{1+\alpha} \left[ \frac{\|\dot{F}(\theta_k)\|_2^{1+\alpha}}{\mathcal{L}_\epsilon(\theta_k)} \right]^{1/\alpha} \mathbf{1}[\tau_j > k-1], \quad (130)$$

where we bound  $\mathbb{P}[\tau_j = k | \mathcal{F}_k]$  using [Theorem 5](#). By applying the bounds on the first term, [\(125\)](#), and second term, [\(130\)](#), to [\(124\)](#), the result follows.  $\square$

By applying [Assumption 5](#) to [Lemma 3](#), we have the following simplified form.

**Lemma 12** ([Lemma 4](#)). *If [Assumptions 1 to 5](#), and [Properties 1 and 4](#) hold, and  $\{\theta_k\}$  satisfy [\(5\)](#), then there exists a  $K \in \mathbb{N}$  such that for any  $j+1 \in \mathbb{N}$  and any  $k \geq \min\{K, j+1\}$ ,*

$$\begin{aligned}
& \mathbb{E}[(F(\theta_{k+1}) - F_{l.b.}) \mathbf{1}[\tau_j > k] | \mathcal{F}_k] \\
& \leq \left( 1 + \lambda_{\max}(M_k)^{1+\alpha} \frac{C_2}{1+\alpha} \right) (F(\theta_k) - F_{l.b.}) \mathbf{1}[\tau_j > k-1] \\
& \quad - \frac{1}{2} \lambda_{\min}(M_k) \left\| \dot{F}(\theta_k) \right\|_2^2 \mathbf{1}[\tau_j > k-1] + \lambda_{\max}(M_k)^{1+\alpha} \frac{C_1}{1+\alpha}. \quad (131)
\end{aligned}$$

*Proof.* The result follows by first using [Assumption 5](#) in [Lemma 3](#). Then, collecting similar terms, we apply [Lemma 6](#) to find  $K$ .  $\square$

## D.2 Objective Function Analysis

With this recursive formula, we now have the first result.

**Corollary 3.** *If [Assumptions 1 to 5](#) and [Properties 1, 2 and 4](#) hold, and  $\{\theta_k\}$  satisfy [\(5\)](#), then  $\lim_{k \rightarrow \infty} F(\theta_k)$  exists and is finite on  $\cup_{j=0}^{\infty} \{\tau_j = \infty\}$ .*

*Proof.* By [Lemma 4](#) and [Robbins and Siegmund \[1971\]](#), [Neveu and Speed \[1975, Exercise II.4\]](#), the limit as  $k$  goes to infinity of  $(F(\theta_k) - F_{l.b.}) \mathbf{1}[\tau_j > k-1]$  exists with probability one and is integrable. Therefore, on the event  $\{\tau_j = \infty\}$ , the limit of  $F(\theta_k) - F_{l.b.}$  exists and is integrable. As a result, the limit of  $F(\theta_k) - F_{l.b.}$  exists and is finite on  $\cup_{j=0}^{\infty} \{\tau_j = \infty\}$ .  $\square$

Additionally, we can state the following useful result.

**Lemma 13.** *If [Assumptions 1 to 5](#), and [Properties 1, 2 and 4](#) hold, and  $\{\theta_k\}$  satisfy [\(5\)](#), then  $\exists K \in \mathbb{N}$  such that for any  $j > K$ ,  $\exists N_j > 0$  for which*

$$\sup_{k > j} \mathbb{E}[(F(\theta_k) - F_{l.b.}) \mathbf{1}[\tau_j > k-1]] \leq N_j. \quad (132)$$

*Proof.* In [Lemma 4](#), we upper bound the right hand side by removing the negative term, and, by [Property 2](#), we add  $C_1(1+\alpha)^{-1} \sum_{\ell=k+1}^{\infty} \lambda_{\max}(M_\ell)^{1+\alpha}$  to both side. Then, for all  $k \geq j$ ,

$$\begin{aligned}
& \mathbb{E}[(F(\theta_{k+1}) - F_{l.b.}) \mathbf{1}[\tau_j > k]] + \frac{C_1}{1+\alpha} \sum_{\ell=k+1}^{\infty} \lambda_{\max}(M_\ell)^{1+\alpha} \\
& \leq \left( 1 + \lambda_{\max}(M_k)^{1+\alpha} \frac{C_2}{1+\alpha} \right) \mathbb{E}[(F(\theta_k) - F_{l.b.}) \mathbf{1}[\tau_j > k-1]] + \frac{C_1}{1+\alpha} \sum_{\ell=k}^{\infty} \lambda_{\max}(M_\ell)^{1+\alpha}. \quad (133)
\end{aligned}$$

Using  $1 + C_2(1 + \alpha)^{-1}\lambda_{\max}(M_k)^{1+\alpha} \leq \exp(C_2(1 + \alpha)^{-1}\lambda_{\max}(M_k)^{1+\alpha})$ , it follows

$$\begin{aligned} & \mathbb{E}[(F(\theta_{k+1}) - F_{l.b.})\mathbf{1}[\tau_j > k]] + \frac{C_1}{1 + \alpha} \sum_{\ell=k+1}^{\infty} \lambda_{\max}(M_{\ell})^{1+\alpha} \\ & \leq \exp\left(\frac{C_2}{1 + \alpha} \lambda_{\max}(M_k)^{1+\alpha}\right) \left[ \mathbb{E}[(F(\theta_k) - F_{l.b.})\mathbf{1}[\tau_j > k - 1]] + \frac{C_1}{1 + \alpha} \sum_{\ell=k}^{\infty} \lambda_{\max}(M_{\ell})^{1+\alpha} \right]. \end{aligned} \quad (134)$$

Hence,

$$\begin{aligned} & \mathbb{E}[(F(\theta_{k+1}) - F_{l.b.})\mathbf{1}[\tau_j > k]] + \frac{C_1}{1 + \alpha} \sum_{\ell=k+1}^{\infty} \lambda_{\max}(M_{\ell})^{1+\alpha} \\ & \leq \exp\left(\frac{C_2}{1 + \alpha} \sum_{\ell=j}^k \lambda_{\max}(M_{\ell})^{1+\alpha}\right) \left[ \mathbb{E}[(F(\theta_j) - F_{l.b.})] + \frac{C_1}{1 + \alpha} \sum_{\ell=j}^{\infty} \lambda_{\max}(M_{\ell})^{1+\alpha} \right], \end{aligned} \quad (135)$$

where we have used  $\mathbf{1}[\tau_j > j - 1] = 1$ . By [Property 2](#), the summation in the exponent is finite, which implies the result.  $\square$

### D.3 Gradient Function Analysis

**Lemma 14.** *If [Assumptions 1 to 5](#), and [Properties 1 to 4](#) hold, and  $\{\theta_k\}$  satisfy [\(5\)](#), then, for any  $\delta > 0$ ,*

$$\mathbb{P}\left[\left\|\dot{F}(\theta_k)\right\|_2 \mathbf{1}[\tau_j > k - 1] \leq \delta \text{ i.o.}\right] = 1. \quad (136)$$

*Proof.* By [Lemma 4](#),

$$\begin{aligned} & \frac{1}{2} \lambda_{\min}(M_k) \mathbb{E}\left[\left\|\dot{F}(\theta_k)\right\|_2^2 \mathbf{1}[\tau_j > k - 1]\right] \leq \mathbb{E}[(F(\theta_k) - F_{l.b.})\mathbf{1}[\tau_j > k - 1]] \\ & - \mathbb{E}[(F(\theta_{k+1}) - F_{l.b.})\mathbf{1}[\tau_j > k]] + \frac{C_2}{1 + \alpha} \lambda_{\max}(M_k)^{1+\alpha} \mathbb{E}[(F(\theta_k) - F_{l.b.})\mathbf{1}[\tau_j > k - 1]] \\ & + \frac{C_1}{1 + \alpha} \lambda_{\max}(M_k)^{1+\alpha}. \end{aligned} \quad (137)$$

By applying [Lemma 13](#),

$$\begin{aligned} & \frac{1}{2} \lambda_{\min}(M_k) \mathbb{E}\left[\left\|\dot{F}(\theta_k)\right\|_2^2 \mathbf{1}[\tau_j > k - 1]\right] \leq \mathbb{E}[(F(\theta_k) - F_{l.b.})\mathbf{1}[\tau_j > k - 1]] \\ & - \mathbb{E}[(F(\theta_{k+1}) - F_{l.b.})\mathbf{1}[\tau_j > k]] + \lambda_{\max}(M_k)^{1+\alpha} \left(\frac{C_2 N_j + C_1}{1 + \alpha}\right). \end{aligned} \quad (138)$$

By summing and using [Assumption 1](#),

$$\begin{aligned} & \frac{1}{2} \sum_{k=j}^{\infty} \lambda_{\min}(M_k) \mathbb{E}\left[\left\|\dot{F}(\theta_k)\right\|_2^2 \mathbf{1}[\tau_j > k - 1]\right] \\ & \leq \mathbb{E}[F(\theta_j) - F_{l.b.}] + \frac{C_2 N_j + C_1}{1 + \alpha} \sum_{k=j}^{\infty} \lambda_{\max}(M_k)^{1+\alpha}. \end{aligned} \quad (139)$$

By [Property 2](#), the right hand side is bounded. Now, by [Property 3](#),

$$\liminf_{k \rightarrow \infty} \mathbb{E}\left[\left\|\dot{F}(\theta_k)\right\|_2^2 \mathbf{1}[\tau_j > k - 1]\right] = 0. \quad (140)$$

Using Markov's inequality, for any  $\ell \in \mathbb{N}$  and any  $\delta > 0$ ,

$$\mathbb{P}\left[\bigcap_{k=\ell}^{\infty} \left\{\left\|\dot{F}(\theta_k)\right\|_2 \mathbf{1}[\tau_j > k - 1] > \delta\right\}\right] \leq \frac{1}{\delta^2} \min_{k \geq \ell} \mathbb{E}\left[\left\|\dot{F}(\theta_k)\right\|_2^2 \mathbf{1}[\tau_j > k - 1]\right] = 0. \quad (141)$$

As the countable union of sets of measure zero have measure zero, the result follows.  $\square$

#### D.4 Stopping Time Analysis

WE compute the probability of  $\{\tau_j = k\}$ .

**Theorem 5.** *Let  $\{\tau_j : j + 1 \in \mathbb{N}\}$  be defined as in (11). If **Assumptions 1, 2 and 4** and **Property 1** hold, and  $\{\theta_k\}$  satisfy (5), then, for any  $j + 1 \in \mathbb{N}$  and any  $k + 1 \in \mathbb{N}$ ,*

$$\mathbb{P}[\tau_j = k | \mathcal{F}_k] \leq \begin{cases} 0 & k \leq j, \\ \lambda_{\max}(M_k)^{1+\alpha} & k > j. \end{cases} \quad (142)$$

Moreover, if **Property 2** also holds, then  $\mathbb{P}[\cup_{j=0}^{\infty} \{\tau_j = \infty\}] = 1$ .

*Proof.* The case of  $k \leq j$  is trivial. So consider only  $k > j$ . By the construction of  $L(\cdot, \cdot)$  and  $\mathcal{L}_\epsilon(\cdot)$ ,  $\omega \in \{L(\theta_k, \theta_{k+1}) > \mathcal{L}_\epsilon(\theta_k)\}$  implies  $\omega \in \{\|\theta_{k+1} - \theta_k\|_2 > (G(\theta_k) \vee \epsilon)^{\frac{1}{1+\alpha}}\}$ . Using (5), Markov's inequality, **Property 1**, we conclude

$$\mathbb{P}[\tau_j = k | \mathcal{F}_k] \leq \mathbb{P}\left[\left\|M_k \dot{f}(\theta_k, X_{k+1})\right\|_2^{1+\alpha} > G(\theta_k) \vee \epsilon \middle| \mathcal{F}_k\right] \quad (143)$$

$$\leq \frac{\lambda_{\max}(M_k)^{1+\alpha} \mathbb{E}\left[\left\|\dot{f}(\theta_k, X_{k+1})\right\|_2^{1+\alpha} \middle| \mathcal{F}_k\right]}{G(\theta_k) \vee \epsilon}. \quad (144)$$

Applying **Assumption 4** supplies the bound on  $\mathbb{P}[\tau_j = k | \mathcal{F}_k]$ . For the second part, note

$$\mathbb{P}[\tau_j = \infty] \geq 1 - \mathbb{P}[\tau_j < \infty] \geq 1 - \sum_{k=j+1}^{\infty} \lambda_{\max}(M_k)^{1+\alpha}. \quad (145)$$

Therefore,

$$\mathbb{P}\left[\bigcup_{j=0}^{\infty} \{\tau_j = \infty\}\right] = \lim_{j \rightarrow \infty} \mathbb{P}[\tau_j = \infty]. \quad (146)$$

Since  $\lim_j \mathbb{P}[\tau_j = \infty] \geq 1 - \lim_j \sum_{k=j+1}^{\infty} \lambda_{\max}(M_k)^{1+\alpha}$ , applying **Property 2** supplies the final result.  $\square$
